# Supplementary material for: FDA-Approved Inhibitors of RTK/Raf Signaling Potently Impair Multiple Steps of In Vitro and Ex Vivo Influenza A Virus Infections
Source: MDPI journal article supplement (doi:10.3390/v14092058), 2022-09-16
Supplement: s1 [file s1]

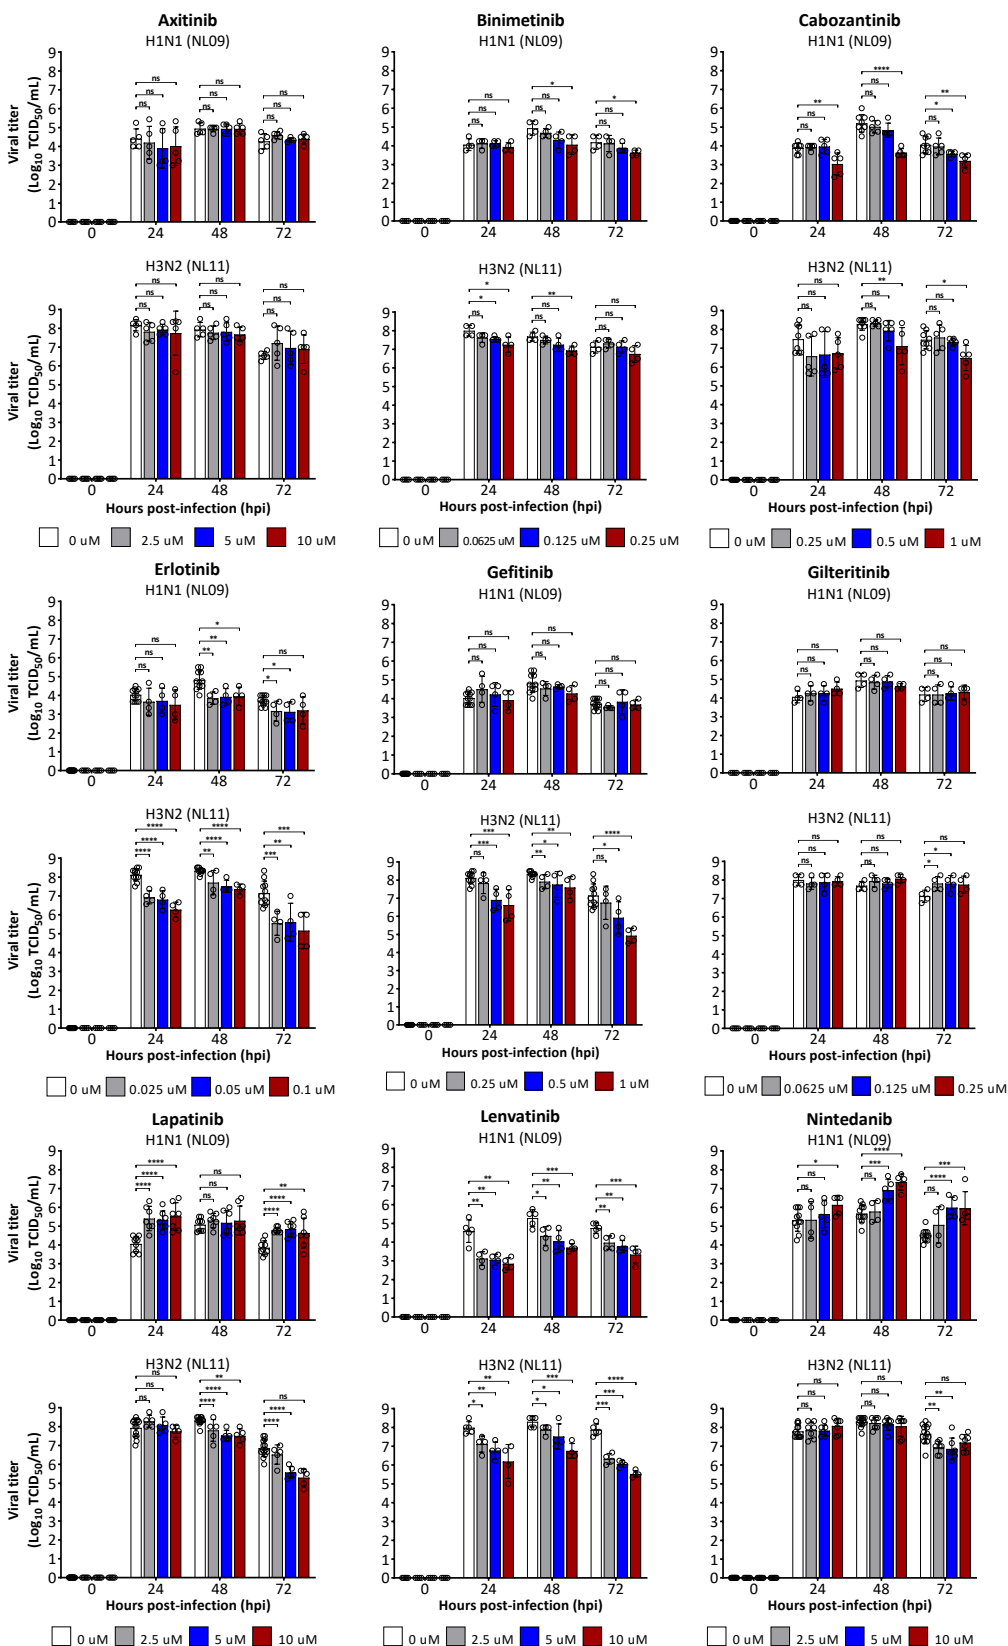

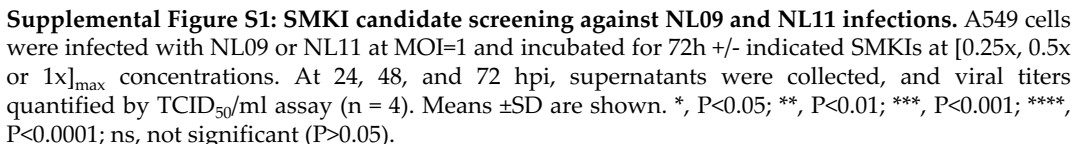

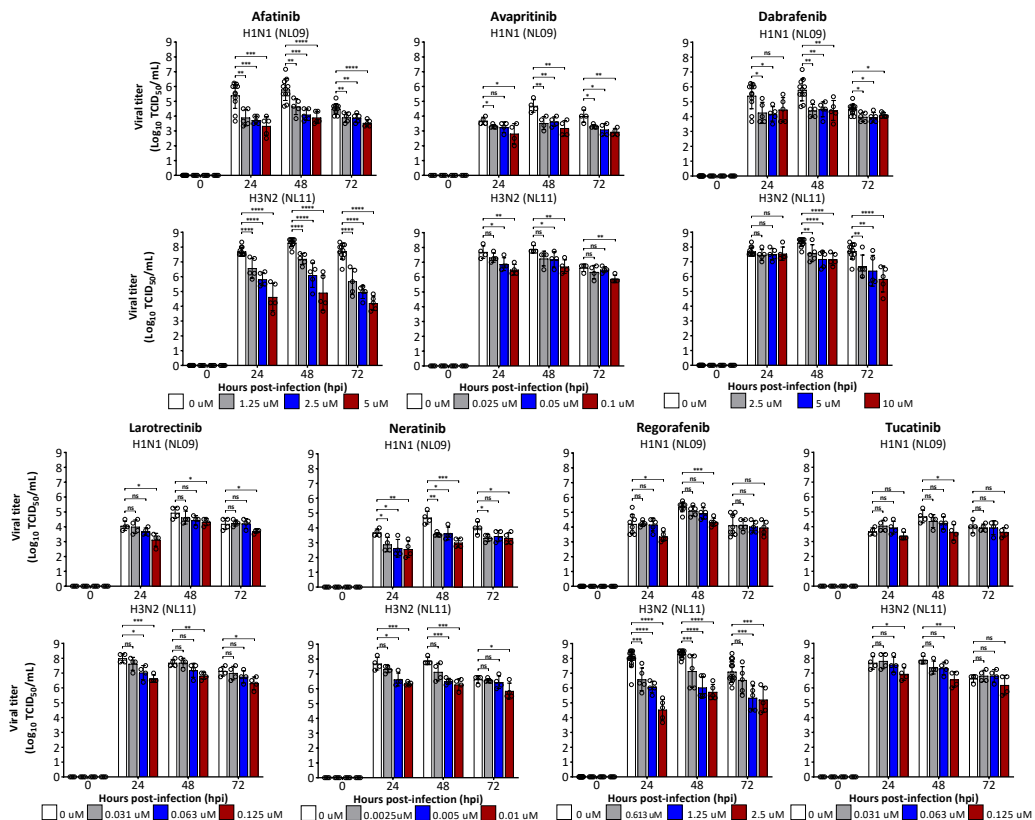

**Supplemental Figure S2: Effect of Selected SMKI treatment on NL09 and NL11 infections. Related to Fig. 1B.** A549 cells were infected with NL09 or NL11 at MOI=1 and incubated for 72h +/- indicated SMKIs at [0.25x, 0.5x or 1x]<sub>max</sub> concentrations. At 24, 48, and 72 hpi, supernatants were collected, and viral titers quantified by TCID<sub>50</sub>/ml assay (n = 4). Means ± SD are shown. \*, P<0.05; \*\*, P<0.01; \*\*\*, P<0.001; \*\*\*\*, P<0.0001; ns, not significant (P>0.05).

NL09 (pH1N1)

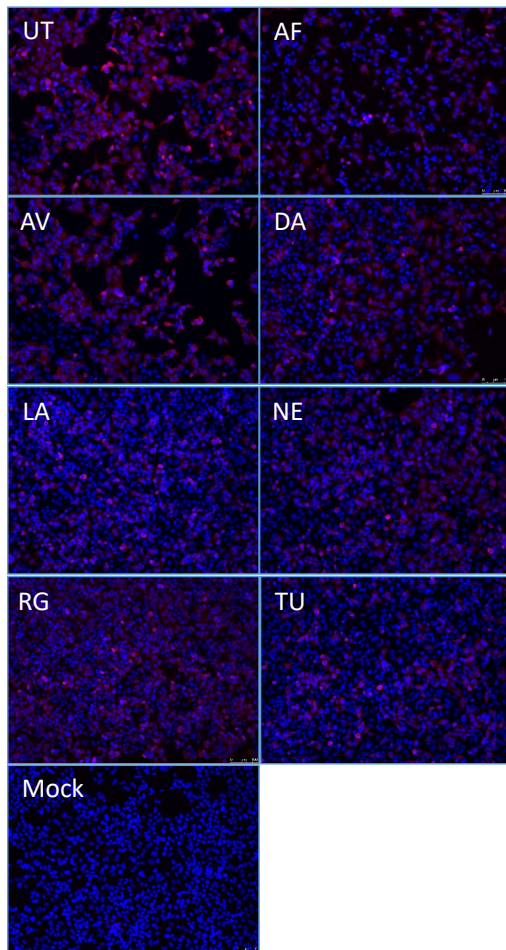

NL11 (H3N2)

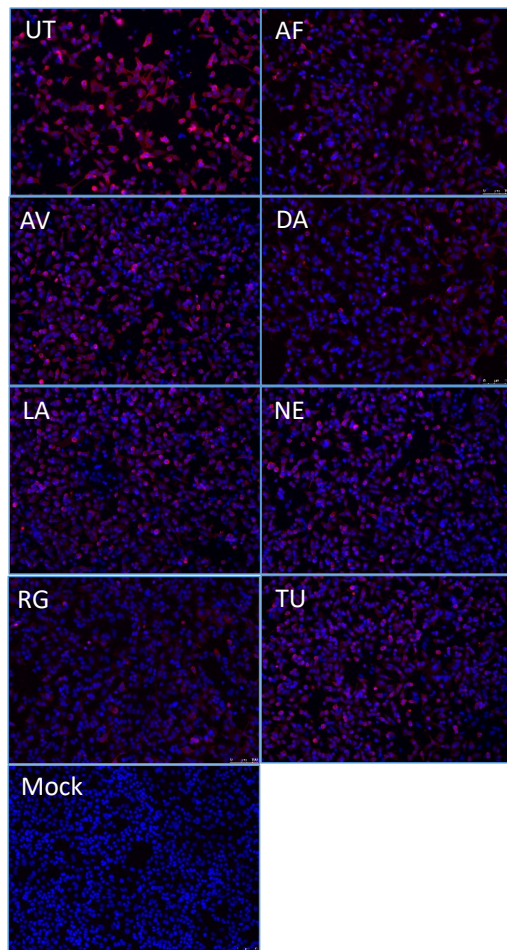

**Supplemental Figure S3. Immunofluorescent detection of SMKIs' effects on cell viability and infectivity during infection. Related to Fig. 1C and 1D.** A549 cells were infected with NL09 or NL11 at MOI=1 +/- indicated SMKIs at  $[0.5x]_{\max}$  concentration for 48h. Fluorescence microscopy pictures were captured using a Leica DMI8 fluorescence microscope (representative field shown from an n=4/condition). Virus- infected cells were detected by anti-IAV NP antibody (red), and nuclei were detected using NucBlue Live ReadyProbes (blue).
